# Supplementary material for: Impact of Immune Cells on Stroke Limited to Specific Subtypes: Evidence from Mendelian Randomization Study
Source: Springer Nature journal article supplement (doi:10.1007/s40120-024-00592-y), 2024-03-06
Supplement: MOESM1 [file 26825914]

## SUPPLEMENTARY MATERIAL

### **Impact of immune cells on stroke limited to specific subtypes: Evidence from Mendelian randomization study**

Chen Chen<sup>1</sup> Qi Liu<sup>2</sup> Yao Li<sup>3</sup> Jingwen Yu<sup>3</sup> Shudi Wang<sup>3</sup> Jiali Xu<sup>3</sup> Li Liu<sup>1\*</sup>

1: The First Department of Cardiovascular, First Affiliated Hospital, Heilongjiang University of Chinese Medicine.

2 : Department of the Treatment Center, the Second Affiliated Hospital of Heilongjiang University of Traditional Chinese Medicine.

3: Department of the Graduate School, Heilongjiang University of Traditional Chinese Medicine.

\* Correspondence:

Li Liu

Heping Road 26, Xiangfang District, Harbin, China.

postal code: 150000

E-mail: [liliu\\_429@126.com](mailto:liliu_429@126.com)

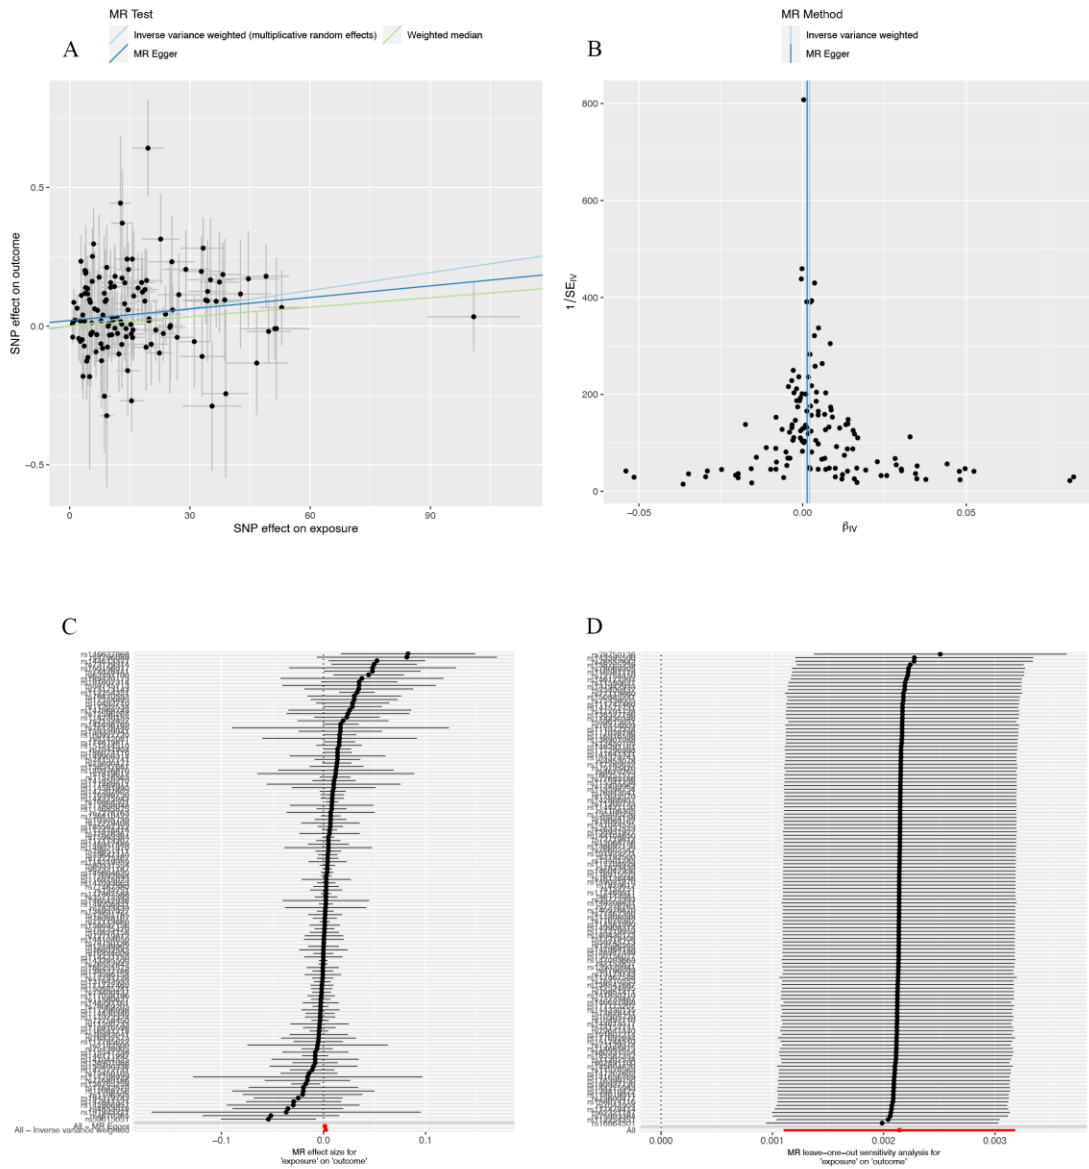

Supplementary Figure 1

MR study of the effects of immunophenotypes on large artery stroke. Scatter plot (A), funnel plot (B), forest plot (C), and leave-one-out sensitivity analysis (D) of the effect of AS on neck fractures.

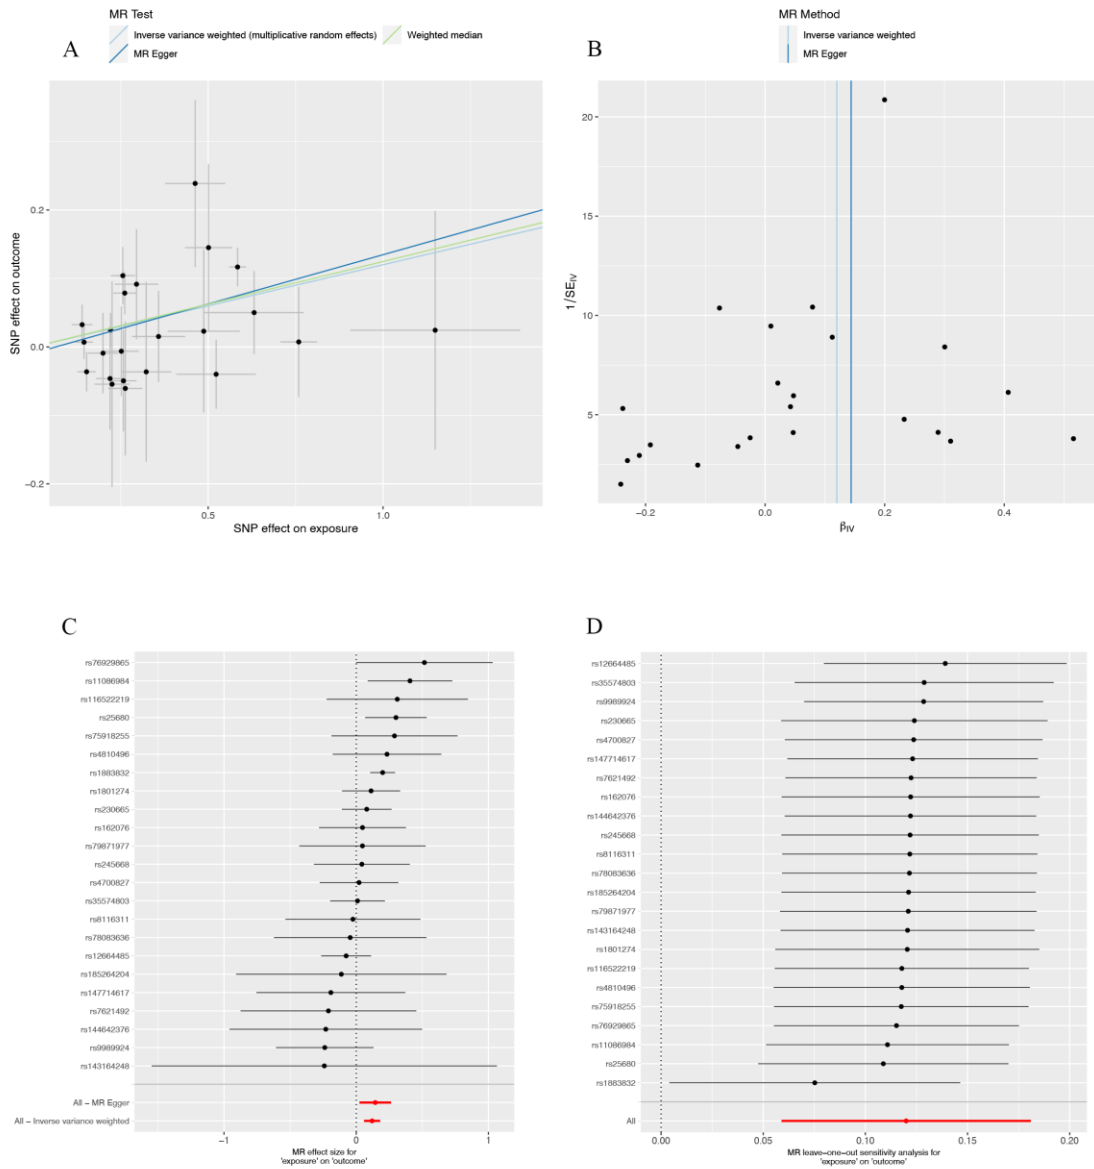

Supplementary Figure 2

MR study of the effects of immunophenotypes on large artery stroke. Scatter plot (A), funnel plot (B), forest plot (C), and leave-one-out sensitivity analysis (D) of the effect of AS on neck fractures.

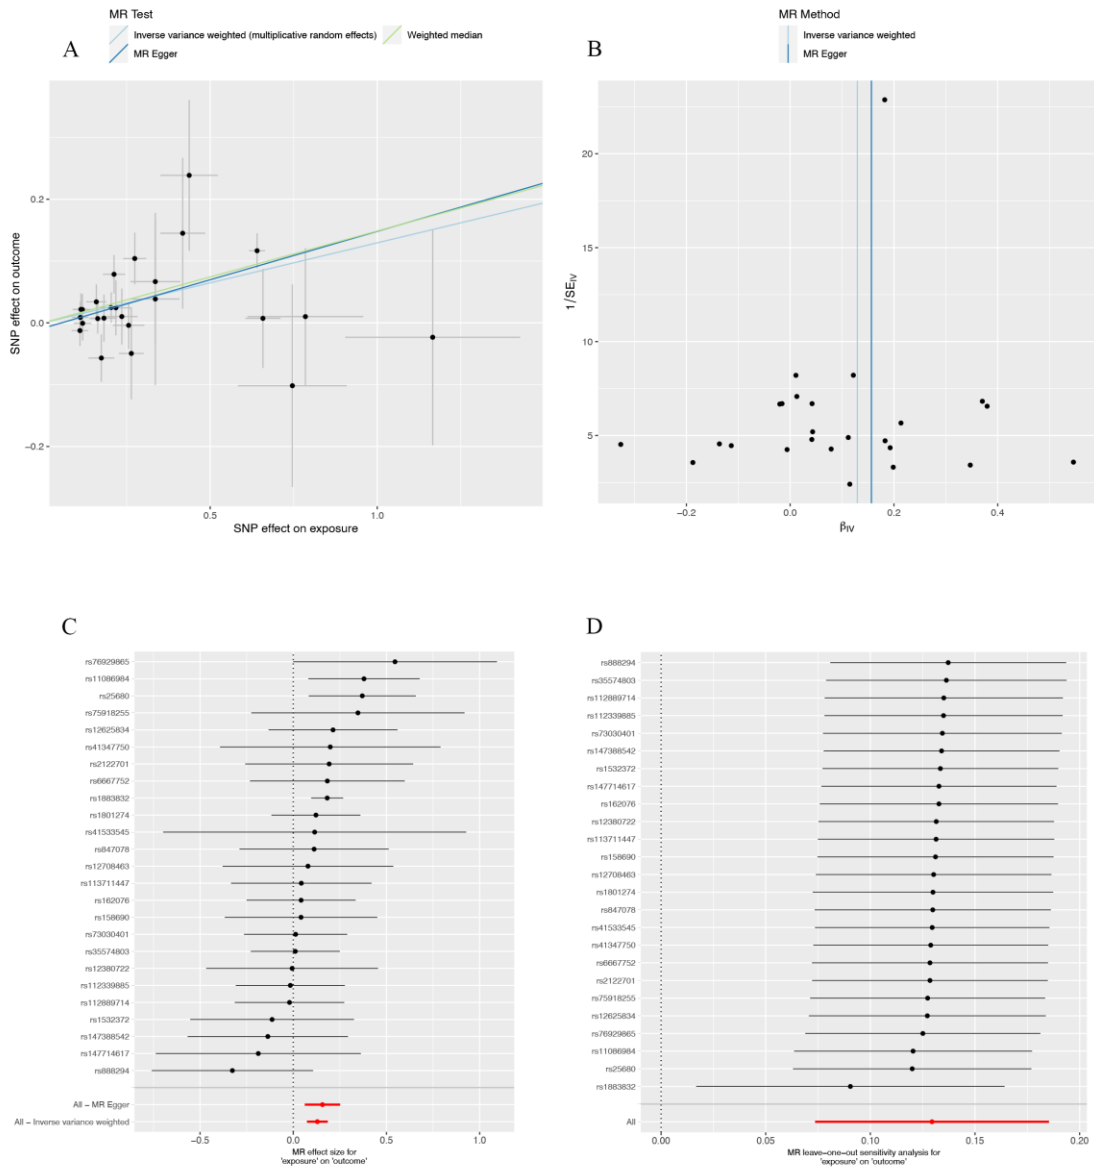

Supplementary Figure 3

MR study of the effects of immunophenotypes on large artery stroke. Scatter plot (A), funnel plot (B), forest plot (C), and leave-one-out sensitivity analysis (D) of the effect of AS on neck fractures.

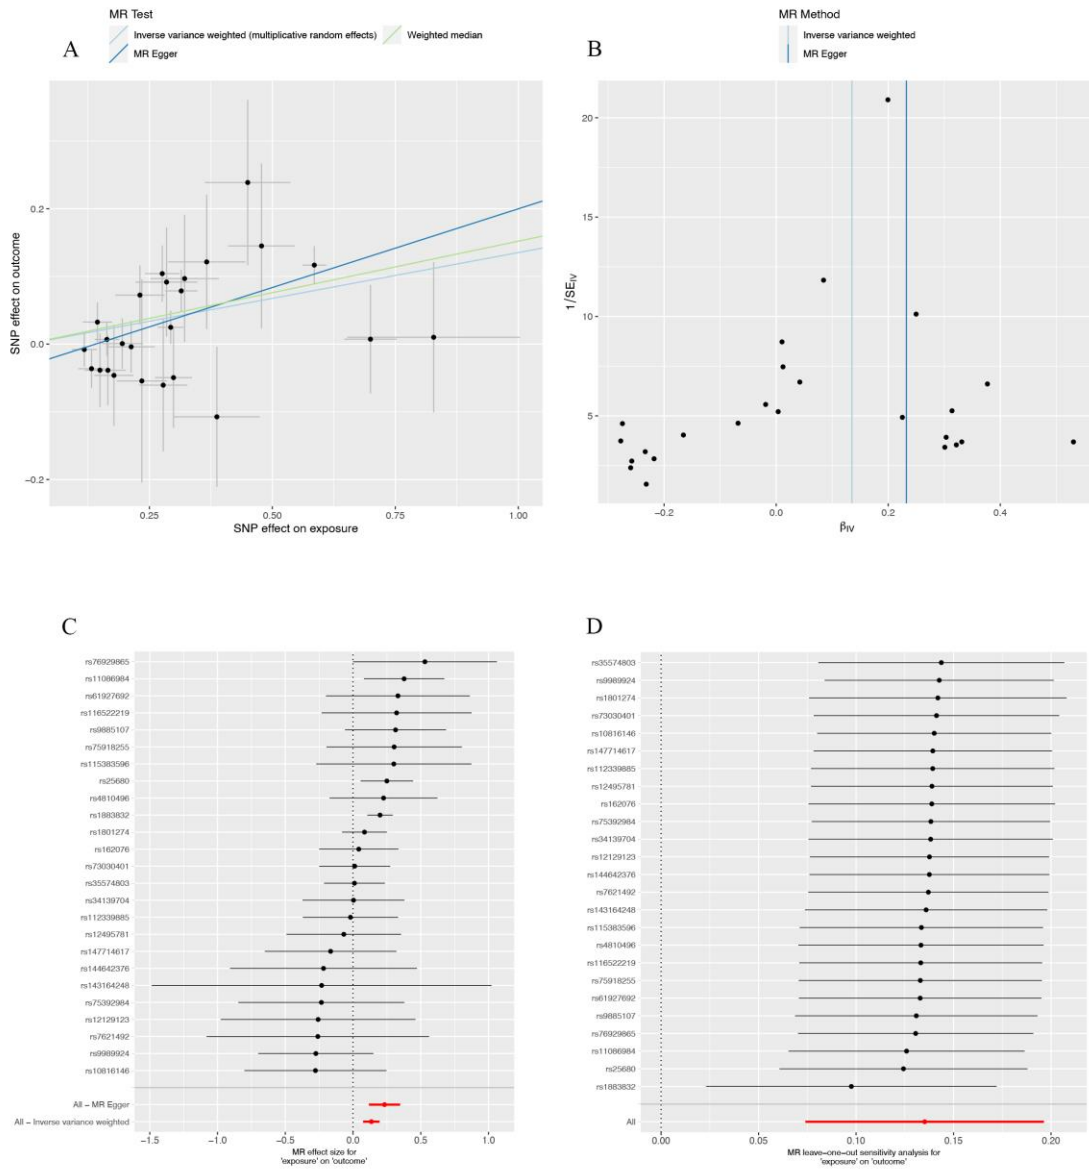

Supplementary Figure 4

MR study of the effects of immunophenotypes on large artery stroke. Scatter plot (A), funnel plot (B), forest plot (C), and leave-one-out sensitivity analysis (D) of the effect of AS on neck fractures.

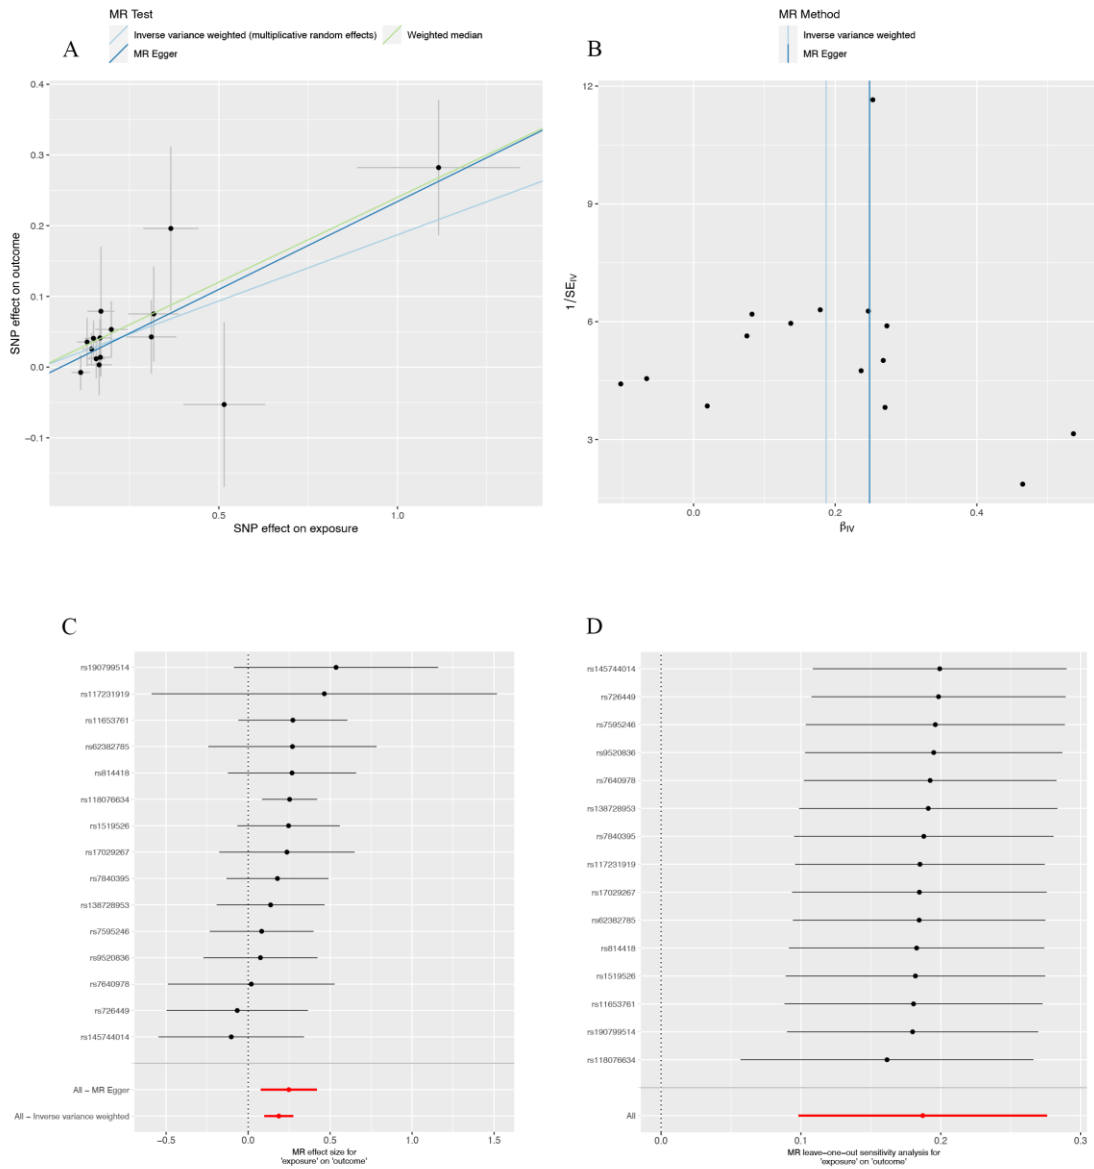

Supplementary Figure 5

MR study of the effects of immunophenotypes on small vessel stroke. Scatter plot (A), funnel plot (B), forest plot (C), and leave-one-out sensitivity analysis (D) of the effect of AS on neck fractures.

**Supplementary Table 1** SNP detailed information selected in CD45RA+ CD28- CD8+ T cell %T cell

| SNP         | EA | O<br>A | Sample size | Beta  | SE     | <i>P</i> | Variance, % | F     |
|-------------|----|--------|-------------|-------|--------|----------|-------------|-------|
| rs10492710  | A  | G      | 3425        | 5.636 | 1.205  | 3.02E-06 | 6.35E-03    | 21.86 |
| rs10505739  | C  | A      | 3425        | 18.81 | 3.393  | 3.21E-08 | 8.89E-03    | 30.72 |
| rs10824158  | T  | G      | 3425        | 9.768 | 1.725  | 1.62E-08 | 9.28E-03    | 32.05 |
| rs1106305   | T  | C      | 3425        | 2.681 | 0.5792 | 3.82E-06 | 6.22E-03    | 21.41 |
| rs111747460 | A  | G      | 3425        | 26.82 | 4.296  | 4.81E-10 | 1.13E-02    | 38.95 |
| rs111972324 | A  | C      | 3425        | 9.939 | 2.208  | 7.00E-06 | 5.88E-03    | 20.25 |
| rs11200733  | A  | G      | 3425        | 5.664 | 1.165  | 1.21E-06 | 6.85E-03    | 23.62 |
| rs11202534  | T  | G      | 3425        | 13.13 | 2.792  | 2.66E-06 | 6.42E-03    | 22.10 |
| rs112254351 | A  | G      | 3425        | 19.55 | 3.788  | 2.60E-07 | 7.72E-03    | 26.62 |
| rs113598754 | G  | A      | 3425        | 11.3  | 2.457  | 4.39E-06 | 6.14E-03    | 21.14 |
| rs114219959 | T  | G      | 3425        | 14.57 | 3.276  | 8.91E-06 | 5.74E-03    | 19.77 |
| rs114230155 | A  | G      | 3425        | 9.265 | 1.585  | 5.47E-09 | 9.88E-03    | 34.15 |
| rs114421150 | A  | C      | 3425        | 25    | 4.08   | 1.00E-09 | 1.08E-02    | 37.52 |
| rs114430346 | A  | G      | 3425        | 20.36 | 4.31   | 2.42E-06 | 6.47E-03    | 22.30 |
| rs114581990 | G  | A      | 3425        | 8.874 | 1.564  | 1.51E-08 | 9.31E-03    | 32.17 |
| rs114619811 | G  | A      | 3425        | 15.63 | 2.895  | 7.15E-08 | 8.44E-03    | 29.13 |
| rs114685875 | A  | G      | 3425        | 17.06 | 3.509  | 1.22E-06 | 6.85E-03    | 23.62 |
| rs115541238 | A  | G      | 3425        | 9.457 | 2.127  | 9.02E-06 | 5.74E-03    | 19.76 |
| rs11576563  | T  | C      | 3425        | 13.78 | 2.988  | 4.16E-06 | 6.17E-03    | 21.26 |
| rs11580627  | C  | T      | 3425        | 15.69 | 3.028  | 2.33E-07 | 7.78E-03    | 26.83 |
| rs116399750 | A  | G      | 3425        | 17.96 | 3.205  | 2.27E-08 | 9.09E-03    | 31.38 |
| rs116581718 | C  | T      | 3425        | 22.4  | 3.301  | 1.35E-11 | 1.33E-02    | 46.02 |
| rs116915023 | T  | C      | 3425        | 10.65 | 1.782  | 2.50E-09 | 1.03E-02    | 35.70 |
| rs116916598 | G  | A      | 3425        | 19.07 | 3.407  | 2.33E-08 | 9.06E-03    | 31.31 |
| rs117038196 | A  | G      | 3425        | 11.96 | 2.665  | 7.38E-06 | 5.85E-03    | 20.13 |
| rs117173207 | A  | G      | 3425        | 18.77 | 3.342  | 2.10E-08 | 9.13E-03    | 31.53 |
| rs117296998 | T  | C      | 3425        | 10.5  | 2.211  | 2.10E-06 | 6.54E-03    | 22.54 |
| rs117469911 | A  | C      | 3425        | 6.228 | 1.155  | 7.39E-08 | 8.42E-03    | 29.06 |
| rs117478414 | T  | C      | 3425        | 32.87 | 5.796  | 1.53E-08 | 9.30E-03    | 32.14 |
| rs117692894 | T  | G      | 3425        | 33.95 | 5.804  | 5.41E-09 | 9.89E-03    | 34.20 |
| rs117708929 | C  | T      | 3425        | 3.153 | 0.6419 | 9.43E-07 | 7.00E-03    | 24.11 |
| rs117785622 | T  | G      | 3425        | 13.02 | 2.395  | 5.79E-08 | 8.55E-03    | 29.54 |
| rs117808048 | A  | G      | 3425        | 6.969 | 1.557  | 7.90E-06 | 5.82E-03    | 20.02 |
| rs117867588 | A  | G      | 3425        | 36.56 | 6.272  | 6.06E-09 | 9.82E-03    | 33.96 |
| rs12068756  | C  | T      | 3425        | 2.264 | 0.4741 | 1.86E-06 | 6.61E-03    | 22.79 |
| rs12279408  | T  | C      | 3425        | 16    | 2.92   | 4.60E-08 | 8.69E-03    | 30.01 |
| rs12450105  | C  | T      | 3425        | 6.576 | 1.424  | 4.02E-06 | 6.19E-03    | 21.31 |

|             |   |   |      |       |        |          |          |       |
|-------------|---|---|------|-------|--------|----------|----------|-------|
| rs12499962  | G | A | 3425 | 25.15 | 3.141  | 1.59E-15 | 1.84E-02 | 64.07 |
| rs12501785  | A | G | 3425 | 10.8  | 1.881  | 1.00E-08 | 9.53E-03 | 32.95 |
| rs12596264  | A | G | 3425 | 7.351 | 1.534  | 1.72E-06 | 6.66E-03 | 22.95 |
| rs132751    | T | C | 3425 | 11.84 | 2.178  | 5.73E-08 | 8.55E-03 | 29.53 |
| rs137942933 | T | G | 3425 | 23.37 | 3.154  | 1.58E-13 | 1.58E-02 | 54.87 |
| rs138327786 | A | G | 3425 | 21.5  | 3.886  | 3.38E-08 | 8.86E-03 | 30.59 |
| rs138410422 | A | G | 3425 | 28.99 | 5.954  | 1.17E-06 | 6.87E-03 | 23.69 |
| rs138547687 | A | G | 3425 | 11.19 | 2.452  | 5.22E-06 | 6.04E-03 | 20.81 |
| rs138697156 | G | A | 3425 | 12.79 | 2.872  | 8.71E-06 | 5.76E-03 | 19.82 |
| rs138765259 | G | T | 3425 | 15.44 | 2.921  | 1.33E-07 | 8.09E-03 | 27.92 |
| rs138901088 | A | C | 3425 | 12.28 | 2.651  | 3.74E-06 | 6.23E-03 | 21.44 |
| rs138937927 | T | C | 3425 | 23.94 | 3.906  | 9.81E-10 | 1.08E-02 | 37.54 |
| rs139329941 | T | C | 3425 | 5.185 | 1.061  | 1.07E-06 | 6.92E-03 | 23.87 |
| rs140976870 | T | C | 3425 | 3.271 | 0.7129 | 4.64E-06 | 6.11E-03 | 21.04 |
| rs141044525 | T | C | 3425 | 7.807 | 1.526  | 3.27E-07 | 7.58E-03 | 26.16 |
| rs141656769 | T | G | 3425 | 14.34 | 2.896  | 7.73E-07 | 7.11E-03 | 24.50 |
| rs141850210 | A | G | 3425 | 9.155 | 1.747  | 1.71E-07 | 7.95E-03 | 27.45 |
| rs142866937 | C | A | 3425 | 4.265 | 0.9493 | 7.28E-06 | 5.86E-03 | 20.17 |
| rs143395500 | T | C | 3425 | 51.17 | 8.845  | 7.92E-09 | 9.68E-03 | 33.45 |
| rs144104650 | A | G | 3425 | 15.28 | 3.08   | 7.31E-07 | 7.13E-03 | 24.60 |
| rs144275943 | G | T | 3425 | 19.21 | 4.183  | 4.53E-06 | 6.12E-03 | 21.08 |
| rs144613377 | C | T | 3425 | 3.834 | 0.7616 | 5.04E-07 | 7.34E-03 | 25.33 |
| rs145604620 | G | A | 3425 | 34.45 | 4.832  | 1.23E-12 | 1.46E-02 | 50.80 |
| rs146047936 | C | A | 3425 | 7.861 | 1.731  | 5.79E-06 | 5.99E-03 | 20.61 |
| rs146171997 | G | A | 3425 | 35.54 | 7.417  | 1.73E-06 | 6.66E-03 | 22.95 |
| rs146627868 | A | G | 3425 | 2.823 | 0.6163 | 4.79E-06 | 6.09E-03 | 20.97 |
| rs147093663 | T | G | 3425 | 42.63 | 7.413  | 9.65E-09 | 9.56E-03 | 33.05 |
| rs147207602 | A | G | 3425 | 25.5  | 5.734  | 8.99E-06 | 5.74E-03 | 19.77 |
| rs147572731 | T | C | 3425 | 14.48 | 3.001  | 1.44E-06 | 6.75E-03 | 23.27 |
| rs147841321 | T | C | 3425 | 8.69  | 1.67   | 2.08E-07 | 7.84E-03 | 27.06 |
| rs147968748 | G | A | 3425 | 4.517 | 0.9486 | 2.00E-06 | 6.58E-03 | 22.66 |
| rs148291161 | G | A | 3425 | 14.11 | 2.744  | 2.86E-07 | 7.66E-03 | 26.43 |
| rs148947489 | T | C | 3425 | 8.302 | 1.533  | 6.58E-08 | 8.49E-03 | 29.31 |
| rs149021870 | G | A | 3425 | 3.698 | 0.7669 | 1.49E-06 | 6.74E-03 | 23.24 |
| rs149208831 | C | A | 3425 | 25.69 | 4.095  | 3.97E-10 | 1.14E-02 | 39.33 |
| rs149908314 | T | C | 3425 | 8.634 | 1.919  | 7.01E-06 | 5.88E-03 | 20.23 |
| rs150156077 | G | A | 3425 | 4.047 | 0.8896 | 5.56E-06 | 6.01E-03 | 20.68 |
| rs150400236 | T | C | 3425 | 8.214 | 1.748  | 2.70E-06 | 6.41E-03 | 22.07 |
| rs150885241 | A | G | 3425 | 31.1  | 3.924  | 3.08E-15 | 1.80E-02 | 62.78 |
| rs151244510 | A | G | 3425 | 10.23 | 2.22   | 4.19E-06 | 6.16E-03 | 21.22 |



|             |   |   |      |        |        |          |          |       |
|-------------|---|---|------|--------|--------|----------|----------|-------|
| rs16864501  | A | G | 3425 | 33.31  | 5.744  | 7.31E-09 | 9.72E-03 | 33.61 |
| rs17524895  | T | C | 3425 | 4.477  | 0.9611 | 3.31E-06 | 6.30E-03 | 21.69 |
| rs17642570  | C | T | 3425 | 3.649  | 0.7857 | 3.54E-06 | 6.26E-03 | 21.56 |
| rs17791728  | C | T | 3425 | 15.79  | 2.811  | 2.10E-08 | 9.13E-03 | 31.53 |
| rs180927720 | G | A | 3425 | 11.34  | 2.525  | 7.39E-06 | 5.85E-03 | 20.16 |
| rs184379743 | T | C | 3425 | 4.563  | 0.9092 | 5.48E-07 | 7.30E-03 | 25.17 |
| rs185587352 | A | G | 3425 | 18.17  | 3.072  | 3.62E-09 | 1.01E-02 | 34.96 |
| rs186251573 | C | A | 3425 | 14.06  | 2.974  | 2.35E-06 | 6.48E-03 | 22.34 |
| rs1879612   | C | T | 3425 | -0.674 | 0.1475 | 5.05E-06 | 6.06E-03 | 20.87 |
| rs188074116 | A | G | 3425 | 22.71  | 4.723  | 1.59E-06 | 6.71E-03 | 23.11 |
| rs189420173 | G | T | 3425 | 2.937  | 0.5459 | 7.95E-08 | 8.38E-03 | 28.93 |
| rs191607214 | A | C | 3425 | 12.67  | 2.608  | 1.23E-06 | 6.84E-03 | 23.59 |
| rs191923221 | A | G | 3425 | 4.991  | 0.8815 | 1.62E-08 | 9.27E-03 | 32.04 |
| rs2152857   | G | A | 3425 | 4.942  | 0.9868 | 5.77E-07 | 7.27E-03 | 25.07 |
| rs2192500   | G | A | 3425 | 5.306  | 1.184  | 7.66E-06 | 5.83E-03 | 20.07 |
| rs35772393  | T | C | 3425 | 38.7   | 6.463  | 2.34E-09 | 1.04E-02 | 35.83 |
| rs4670265   | G | T | 3425 | 0.773  | 0.1507 | 3.07E-07 | 7.62E-03 | 26.30 |
| rs4796089   | C | T | 3425 | -1.046 | 0.2225 | 2.70E-06 | 6.41E-03 | 22.09 |
| rs4853078   | G | T | 3425 | 9.274  | 1.681  | 3.74E-08 | 8.81E-03 | 30.42 |
| rs59615051  | C | T | 3425 | 3.355  | 0.6746 | 6.91E-07 | 7.17E-03 | 24.72 |
| rs59745713  | A | G | 3425 | 3.978  | 0.8973 | 9.60E-06 | 5.71E-03 | 19.64 |
| rs62321187  | T | C | 3425 | 49     | 5.703  | 1.26E-17 | 2.11E-02 | 73.78 |
| rs62491100  | T | C | 3425 | 5.693  | 1.172  | 1.24E-06 | 6.84E-03 | 23.58 |
| rs7044904   | G | A | 3425 | -14.67 | 3.168  | 3.78E-06 | 6.22E-03 | 21.43 |
| rs72719812  | G | A | 3425 | 13.01  | 2.45   | 1.16E-07 | 8.17E-03 | 28.18 |
| rs72723467  | A | G | 3425 | 27.24  | 5.333  | 3.44E-07 | 7.56E-03 | 26.07 |
| rs72758450  | C | T | 3425 | 33.05  | 5.644  | 5.19E-09 | 9.91E-03 | 34.27 |
| rs7276763   | A | G | 3425 | 2.646  | 0.5398 | 9.94E-07 | 6.97E-03 | 24.01 |
| rs73129374  | A | G | 3425 | 5.971  | 1.268  | 2.60E-06 | 6.43E-03 | 22.16 |
| rs73173143  | C | T | 3425 | 1.87   | 0.4185 | 8.16E-06 | 5.80E-03 | 19.95 |
| rs73400437  | T | C | 3425 | 15.37  | 3.316  | 3.72E-06 | 6.23E-03 | 21.47 |
| rs74157741  | T | C | 3425 | 10.21  | 2.298  | 9.19E-06 | 5.73E-03 | 19.73 |
| rs74828441  | C | A | 3425 | 3.976  | 0.8718 | 5.29E-06 | 6.04E-03 | 20.79 |
| rs75438005  | A | G | 3425 | 38.95  | 5.695  | 9.31E-12 | 1.35E-02 | 46.75 |
| rs75600477  | G | T | 3425 | 13.07  | 2.441  | 9.25E-08 | 8.30E-03 | 28.65 |
| rs75993384  | C | T | 3425 | 38.22  | 4.737  | 9.74E-16 | 1.87E-02 | 65.06 |
| rs76128446  | G | A | 3425 | 0.9087 | 0.2045 | 9.10E-06 | 5.73E-03 | 19.73 |
| rs76337573  | G | A | 3425 | 5.366  | 1.027  | 1.86E-07 | 7.91E-03 | 27.28 |
| rs76444609  | A | G | 3425 | 51.58  | 5.751  | 4.82E-19 | 2.29E-02 | 80.39 |
| rs76552842  | A | G | 3425 | 49.64  | 5.557  | 6.60E-19 | 2.28E-02 | 79.75 |

|            |   |   |      |       |        |          |          |       |
|------------|---|---|------|-------|--------|----------|----------|-------|
| rs76602542 | T | C | 3425 | 9.611 | 2.144  | 7.59E-06 | 5.83E-03 | 20.08 |
| rs76942041 | A | G | 3425 | 6.779 | 1.373  | 8.28E-07 | 7.07E-03 | 24.36 |
| rs77113660 | G | A | 3425 | 52.91 | 5.64   | 1.16E-20 | 2.51E-02 | 87.96 |
| rs77467380 | T | C | 3425 | 34.38 | 5.85   | 4.56E-09 | 9.98E-03 | 34.52 |
| rs77676367 | C | T | 3425 | 13.71 | 2.962  | 3.80E-06 | 6.22E-03 | 21.41 |
| rs77689186 | A | C | 3425 | 7.95  | 1.654  | 1.61E-06 | 6.70E-03 | 23.09 |
| rs78069205 | G | A | 3425 | 46.68 | 7.967  | 5.07E-09 | 9.92E-03 | 34.31 |
| rs78088167 | G | A | 3425 | 19.81 | 3.224  | 8.99E-10 | 1.09E-02 | 37.73 |
| rs7823439  | C | T | 3425 | 5.545 | 1.177  | 2.54E-06 | 6.44E-03 | 22.18 |
| rs78470553 | A | G | 3425 | 3.909 | 0.7324 | 1.01E-07 | 8.25E-03 | 28.47 |
| rs78750136 | C | T | 3425 | 100.8 | 11.59  | 5.21E-18 | 2.16E-02 | 75.60 |
| rs79647440 | T | C | 3425 | 37.38 | 4.922  | 3.94E-14 | 1.66E-02 | 57.64 |
| rs79725470 | C | T | 3425 | 19.78 | 3.684  | 8.40E-08 | 8.35E-03 | 28.81 |
| rs79851411 | A | G | 3425 | 35.15 | 5.793  | 1.44E-09 | 1.06E-02 | 36.80 |
| rs80331554 | G | A | 3425 | 44.6  | 7.703  | 7.70E-09 | 9.69E-03 | 33.50 |
| rs8142081  | A | G | 3425 | 1.373 | 0.2961 | 3.68E-06 | 6.24E-03 | 21.49 |

SNP, single-nucleotide polymorphism; EA, effect allele; OA, other\_allele; Beta, the regression coefficient based on CD45RA+ CD28- CD8+ T cell %T cell raising effect allele; SE, standardized error; Variance, proportion of variance in CD45RA+ CD28- CD8+ T cell %T cell explained by each SNP.

**Supplementary Table 2** SNP detailed information selected in CD27 on CD24+ CD27+ B cell

| SNP         | EA | OA | Samplesize | Beta    | SE      | P         | Variance,<br>% | F      |
|-------------|----|----|------------|---------|---------|-----------|----------------|--------|
| rs11086984  | T  | C  | 3657       | 0.256   | 0.03444 | 1.30E-13  | 1.49E-02       | 55.22  |
| rs116522219 | A  | G  | 3657       | 0.2952  | 0.06225 | 2.19E-06  | 6.11E-03       | 22.48  |
| rs12664485  | C  | T  | 3657       | 0.5228  | 0.1137  | 4.45E-06  | 5.75E-03       | 21.13  |
| rs143164248 | A  | G  | 3657       | 0.2253  | 0.05034 | 7.85E-06  | 5.45E-03       | 20.02  |
| rs144642376 | G  | A  | 3657       | 0.2632  | 0.04883 | 7.51E-08  | 7.88E-03       | 29.04  |
| rs147714617 | T  | C  | 3657       | 0.2579  | 0.03725 | 5.23E-12  | 1.29E-02       | 47.91  |
| rs162076    | A  | G  | 3657       | -0.1453 | 0.02494 | 6.20E-09  | 9.20E-03       | 33.92  |
| rs1801274   | G  | A  | 3657       | -0.2208 | 0.02632 | 7.07E-17  | 1.89E-02       | 70.34  |
| rs185264204 | T  | C  | 3657       | 0.323   | 0.07164 | 6.72E-06  | 5.53E-03       | 20.32  |
| rs1883832   | C  | T  | 3657       | -0.5841 | 0.02417 | 8.47E-120 | 1.38E-01       | 583.69 |
| rs230665    | A  | G  | 3657       | 0.6315  | 0.142   | 8.96E-06  | 5.38E-03       | 19.77  |
| rs245668    | A  | G  | 3657       | 0.3582  | 0.07588 | 2.44E-06  | 6.06E-03       | 22.27  |
| rs25680     | A  | G  | 3657       | -0.2616 | 0.03299 | 2.87E-15  | 1.69E-02       | 62.85  |
| rs35574803  | C  | T  | 3657       | 0.7589  | 0.05246 | 3.63E-46  | 5.41E-02       | 209.16 |
| rs4700827   | G  | A  | 3657       | -1.149  | 0.243   | 2.33E-06  | 6.08E-03       | 22.35  |
| rs4810496   | A  | G  | 3657       | -0.1397 | 0.02969 | 2.65E-06  | 6.02E-03       | 22.13  |
| rs75918255  | A  | G  | 3657       | 0.5011  | 0.06717 | 1.07E-13  | 1.50E-02       | 55.62  |
| rs7621492   | A  | G  | 3657       | 0.2196  | 0.03939 | 2.67E-08  | 8.43E-03       | 31.06  |
| rs76929865  | C  | A  | 3657       | 0.4628  | 0.08601 | 7.88E-08  | 7.85E-03       | 28.94  |
| rs78083636  | G  | T  | 3657       | -0.1994 | 0.04317 | 3.97E-06  | 5.80E-03       | 21.32  |
| rs79871977  | A  | C  | 3657       | 0.4874  | 0.103   | 2.31E-06  | 6.09E-03       | 22.38  |
| rs8116311   | T  | C  | 3657       | 0.2517  | 0.0498  | 4.53E-07  | 6.94E-03       | 25.53  |
| rs9989924   | C  | T  | 3657       | 0.1525  | 0.02627 | 7.02E-09  | 9.13E-03       | 33.68  |

SNP, single-nucleotide polymorphism; EA, effect allele; OA, other\_allele; Beta, the regression coefficient based on CD27 on CD24+ CD27+ B cell raising effect allele; SE, standardized error; Variance, proportion of variance in CD27 on CD24+ CD27+ B cell explained by each SNP.

**Supplementary Table 3** SNP detailed information selected in CD27 on IgD- CD38dim B cell

|             |   |   |      |         |         |           |          |        |
|-------------|---|---|------|---------|---------|-----------|----------|--------|
| rs11086984  | T | C | 3657 | 0.2742  | 0.03426 | 1.59E-15  | 1.72E-02 | 64.02  |
| rs112339885 | C | T | 3657 | 0.2558  | 0.0472  | 6.32E-08  | 7.97E-03 | 29.35  |
| rs112889714 | A | G | 3657 | 1.166   | 0.2618  | 8.72E-06  | 5.39E-03 | 19.83  |
| rs113711447 | G | T | 3657 | -0.2355 | 0.04702 | 5.72E-07  | 6.81E-03 | 25.07  |
| rs12380722  | T | C | 3657 | 0.1182  | 0.02624 | 6.86E-06  | 5.52E-03 | 20.28  |
| rs12625834  | A | G | 3657 | -0.1592 | 0.03012 | 1.32E-07  | 7.58E-03 | 27.92  |
| rs12708463  | A | G | 3657 | -0.1113 | 0.02452 | 5.85E-06  | 5.60E-03 | 20.59  |
| rs147388542 | C | A | 3657 | 0.746   | 0.1629  | 4.83E-06  | 5.70E-03 | 20.96  |
| rs147714617 | T | C | 3657 | 0.264   | 0.03709 | 1.33E-12  | 1.37E-02 | 50.64  |
| rs1532372   | C | T | 3657 | -0.1102 | 0.02459 | 7.58E-06  | 5.46E-03 | 20.07  |
| rs158690    | G | A | 3657 | 0.182   | 0.0383  | 2.10E-06  | 6.14E-03 | 22.57  |
| rs162076    | A | G | 3657 | -0.1634 | 0.02479 | 5.03E-11  | 1.17E-02 | 43.42  |
| rs1801274   | G | A | 3657 | -0.2036 | 0.02626 | 1.14E-14  | 1.62E-02 | 60.08  |
| rs1883832   | C | T | 3657 | -0.6404 | 0.02368 | 6.21E-147 | 1.67E-01 | 730.97 |
| rs2122701   | T | C | 3657 | -0.1131 | 0.02485 | 5.54E-06  | 5.63E-03 | 20.70  |
| rs25680     | A | G | 3657 | -0.2122 | 0.03291 | 1.29E-10  | 1.12E-02 | 41.55  |
| rs35574803  | C | T | 3657 | 0.6579  | 0.05259 | 3.42E-35  | 4.10E-02 | 156.41 |
| rs41347750  | T | C | 3657 | 0.3357  | 0.07433 | 6.49E-06  | 5.55E-03 | 20.39  |
| rs41533545  | G | A | 3657 | 0.3358  | 0.07241 | 3.67E-06  | 5.85E-03 | 21.49  |
| rs6667752   | G | T | 3657 | 0.1175  | 0.02605 | 6.63E-06  | 5.53E-03 | 20.33  |
| rs73030401  | G | A | 3657 | 0.785   | 0.1732  | 6.03E-06  | 5.59E-03 | 20.53  |
| rs75918255  | A | G | 3657 | 0.4177  | 0.06693 | 4.84E-10  | 1.05E-02 | 38.93  |
| rs76929865  | C | A | 3657 | 0.4372  | 0.08573 | 3.57E-07  | 7.06E-03 | 25.99  |
| rs847078    | G | A | 3657 | 0.2178  | 0.04643 | 2.82E-06  | 5.98E-03 | 21.99  |
| rs888294    | T | C | 3657 | 0.1743  | 0.03847 | 6.10E-06  | 5.58E-03 | 20.52  |

SNP, single-nucleotide polymorphism; EA, effect allele; OA, other\_allele; Beta, the regression coefficient based on CD27 on IgD- CD38dim B cell raising effect allele; SE, standardized error; Variance, proportion of variance in CD27 on IgD- CD38dim B cell explained by each SNP.

**Supplementary Table 4** SNP detailed information selected in CD27 on switched memory B cell

| SNP         | EA | OA | Samplesize | Beta | SE      | P         | Variance, % | F      |
|-------------|----|----|------------|------|---------|-----------|-------------|--------|
| rs10816146  | T  | C  | -0.3872    | 3657 | 0.08721 | 9.29E-06  | 5.36E-03    | 19.70  |
| rs11086984  | T  | C  | 0.2761     | 3657 | 0.03467 | 2.23E-15  | 1.70E-02    | 63.39  |
| rs112339885 | C  | T  | 0.2129     | 3657 | 0.04782 | 8.78E-06  | 5.39E-03    | 19.81  |
| rs115383596 | C  | T  | 0.3216     | 3657 | 0.0697  | 4.09E-06  | 5.79E-03    | 21.28  |
| rs116522219 | A  | G  | 0.2849     | 3657 | 0.06277 | 5.85E-06  | 5.60E-03    | 20.59  |
| rs12129123  | T  | C  | 0.1494     | 3657 | 0.03066 | 1.14E-06  | 6.45E-03    | 23.73  |
| rs12495781  | C  | T  | -0.1176    | 3657 | 0.02554 | 4.30E-06  | 5.76E-03    | 21.19  |
| rs143164248 | A  | G  | 0.2346     | 3657 | 0.05074 | 3.91E-06  | 5.81E-03    | 21.37  |
| rs144642376 | G  | A  | 0.2781     | 3657 | 0.0492  | 1.69E-08  | 8.66E-03    | 31.93  |
| rs147714617 | T  | C  | 0.299      | 3657 | 0.03747 | 1.93E-15  | 1.71E-02    | 63.64  |
| rs162076    | A  | G  | -0.1635    | 3657 | 0.02512 | 8.52E-11  | 1.15E-02    | 42.34  |
| rs1801274   | G  | A  | -0.2933    | 3657 | 0.02635 | 2.48E-28  | 3.28E-02    | 123.83 |
| rs1883832   | C  | T  | -0.5853    | 3657 | 0.02439 | 2.53E-118 | 1.36E-01    | 575.57 |
| rs25680     | A  | G  | -0.3147    | 3657 | 0.03313 | 3.76E-21  | 2.41E-02    | 90.18  |
| rs34139704  | C  | T  | -0.1949    | 3657 | 0.04227 | 4.13E-06  | 5.78E-03    | 21.25  |
| rs35574803  | C  | T  | 0.6995     | 3657 | 0.05313 | 1.02E-38  | 4.53E-02    | 173.24 |
| rs4810496   | A  | G  | -0.1443    | 3657 | 0.02993 | 1.49E-06  | 6.32E-03    | 23.23  |
| rs61927692  | T  | C  | 0.3665     | 3657 | 0.07867 | 3.30E-06  | 5.90E-03    | 21.69  |
| rs73030401  | G  | A  | 0.828      | 3657 | 0.1759  | 2.61E-06  | 6.02E-03    | 22.15  |
| rs75392984  | T  | G  | -0.1656    | 3657 | 0.03635 | 5.35E-06  | 5.64E-03    | 20.74  |
| rs75918255  | A  | G  | 0.478      | 3657 | 0.06777 | 2.09E-12  | 1.34E-02    | 49.72  |
| rs7621492   | A  | G  | 0.1779     | 3657 | 0.03976 | 7.92E-06  | 5.44E-03    | 20.01  |
| rs76929865  | C  | A  | 0.4499     | 3657 | 0.08672 | 2.24E-07  | 7.31E-03    | 26.90  |
| rs9885107   | A  | G  | 0.2307     | 3657 | 0.05047 | 5.01E-06  | 5.68E-03    | 20.88  |
| rs9989924   | C  | T  | 0.1323     | 3657 | 0.02651 | 6.36E-07  | 6.76E-03    | 24.89  |

SNP, single-nucleotide polymorphism; EA, effect allele; OA, other\_allele; Beta, the regression coefficient based on CD27 on switched memory B cell raising effect allele; SE, standardized error; Variance, proportion of variance in CD27 on switched memory B cell explained by each SNP.

**Supplementary Table 5** SNP detailed information selected in switched memory B cell % lymphocyte

| SNP         | EA | OA | Samplesize | Beta    | SE      | <i>P</i> | Variance, % | F     |
|-------------|----|----|------------|---------|---------|----------|-------------|-------|
| rs11653761  | T  | G  | 3656       | -0.1491 | 0.02489 | 2.30E-09 | 9.72E-03    | 35.86 |
| rs117231919 | T  | C  | 3656       | 0.17    | 0.03776 | 6.95E-06 | 5.51E-03    | 20.26 |
| rs118076634 | T  | C  | 3656       | 1.115   | 0.2283  | 1.08E-06 | 6.48E-03    | 23.84 |
| rs138728953 | A  | C  | 3656       | 0.311   | 0.06986 | 8.78E-06 | 5.39E-03    | 19.81 |
| rs145744014 | T  | C  | 3656       | 0.5148  | 0.1143  | 6.92E-06 | 5.52E-03    | 20.27 |
| rs1519526   | C  | T  | 3656       | 0.1674  | 0.03168 | 1.34E-07 | 7.58E-03    | 27.91 |
| rs17029267  | T  | C  | 3656       | 0.3178  | 0.07088 | 7.56E-06 | 5.47E-03    | 20.09 |
| rs190799514 | C  | T  | 3656       | 0.3656  | 0.07711 | 2.20E-06 | 6.11E-03    | 22.47 |
| rs62382785  | A  | G  | 3656       | 0.1313  | 0.02902 | 6.23E-06 | 5.57E-03    | 20.46 |
| rs726449    | T  | C  | 3656       | 0.1133  | 0.02505 | 6.36E-06 | 5.56E-03    | 20.45 |
| rs7595246   | C  | T  | 3656       | 0.1684  | 0.03143 | 8.92E-08 | 7.79E-03    | 28.69 |
| rs7640978   | T  | C  | 3656       | 0.1649  | 0.0355  | 3.54E-06 | 5.87E-03    | 21.56 |
| rs7840395   | G  | A  | 3656       | -0.1437 | 0.02516 | 1.21E-08 | 8.84E-03    | 32.60 |
| rs814418    | T  | G  | 3656       | 0.199   | 0.04491 | 9.68E-06 | 5.34E-03    | 19.62 |

|            |   |   |      |         |         |          |          |       |
|------------|---|---|------|---------|---------|----------|----------|-------|
| rs9520836  | T | C | 3656 | 0.1567  | 0.02479 | 2.91E-10 | 1.08E-02 | 39.93 |
| rs11653761 | G | A | 3656 | -0.1491 | 0.02489 | 2.30E-09 | 9.72E-03 | 35.86 |

SNP, single-nucleotide polymorphism; EA, effect allele; OA, other\_allele; Beta, the regression coefficient based on switched memory B cell % lymphocyte raising effect allele; SE, standardized error; Variance, proportion of variance in switched memory B cell % lymphocyte explained by each SNP.

**Supplementary Table 6** MR Sensitivity Analyses of Genetically Predicted immunophenotypes on Large artery stroke and Small vessel stroke

| Outcome             | Exposure                           | Heterogeneity tests |                            | Directional horizontal pleiotropyCest |              |
|---------------------|------------------------------------|---------------------|----------------------------|---------------------------------------|--------------|
|                     |                                    | Methods             | Cochran'sQ(P)              | MR-Egger intercept (P)                | Ppleiotropy* |
| Large artery stroke | CD45RA+ CD28- CD8+ T cell %T cell  | MR Egger , IVW      | 110.42(0.23) ,113.21(0.21) | 0.01(0.08)                            | 0.16         |
|                     | CD27 on CD24+ CD27+ B cell         | MR Egger,IVW        | 25.59(0.22) , 25.85(0.25)  | -0.007(0.24)                          | 0.21         |
|                     | CD27 on IgD- CD38dim B cell        | MR Egger,IVW        | 22.42(0.49) , 22.90(0.52)  | -0.004(0.37)                          | 0.48         |
|                     | CD27 on switched memory B cell     | MR Egger,IVW        | 23.85(0.41) , 27.65(0.27)  | -0.08(0.11)                           | 0.22         |
| Small vessel stroke | Switched memory B cell %lymphocyte | MR Egger,IVW        | 6.40(0.93) , 7.07(0.93)    | -0.01(0.34)                           | 0.31         |

\*detect by MR-PRESSO Global Test; MR-Egger, Mendelian randomization-Egger; IVW, inverse-variance weighted.
